# Supplementary material
Source: PubMed Central journal article supplement (PMC7995021)

MOI 0.01

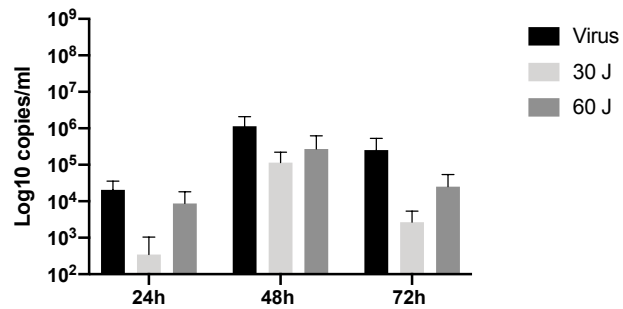

MOI 0.1

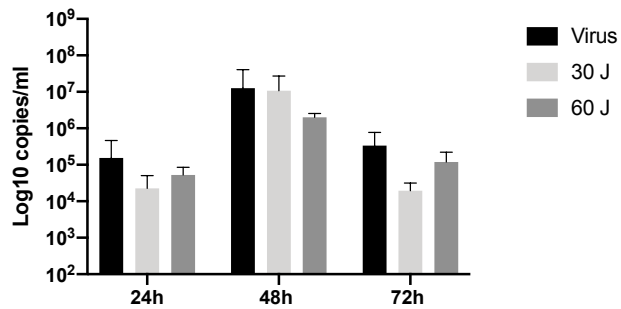

MOI 1

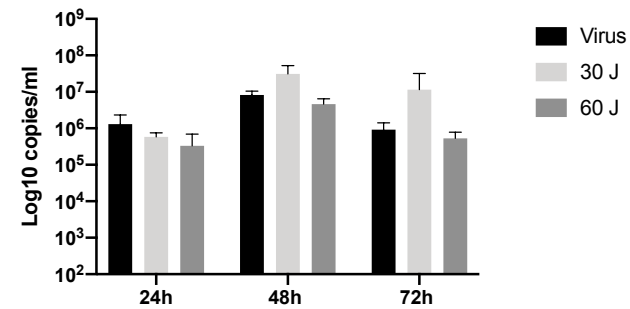

450 nm

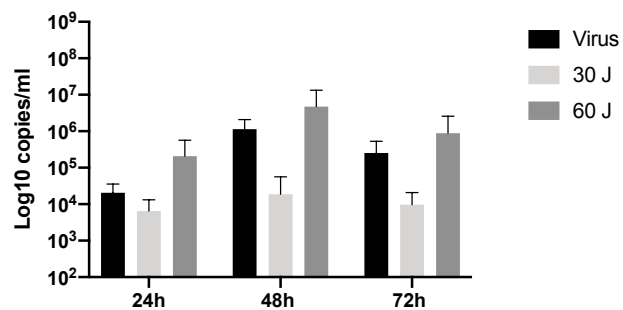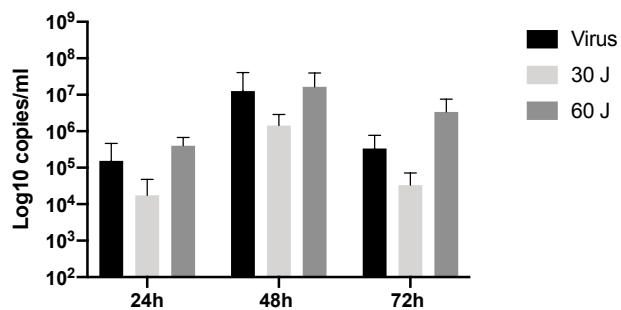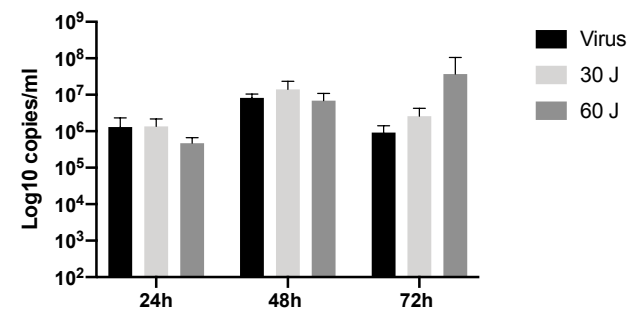

454 nm

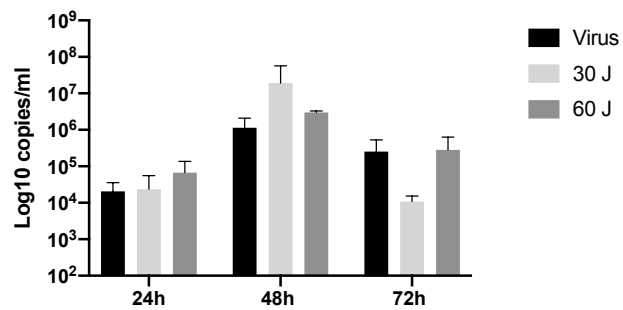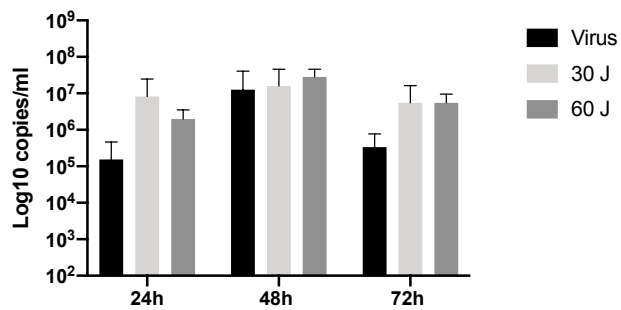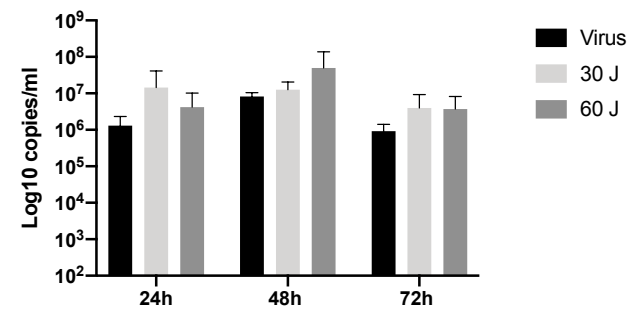

470 nm

Supplement: JBIO-14-0-s001.pdf [file JBIO-14-0-s001.pdf]
